# Supplementary material for: ITIH5-Derived Polypeptides Covering the VIT Domain Suppress the Growth of Human Cancer Cells In Vitro
Source: MDPI journal article supplement (doi:10.3390/cancers14030488), 2022-01-19
Supplement: s1 [file s1]

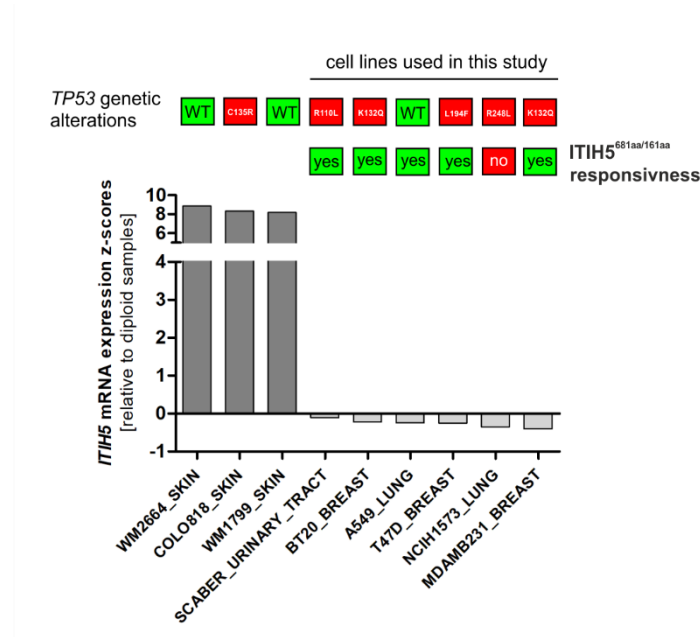

**Figure S2:** Illustration of the relative endogenous *ITIH5* mRNA expression (see Cancer Cell Line Encyclopedia of the cBioportal data base [40,41]) of malignant cell lines (light grey bars) selected for functional analyses in this study compared to *ITIH5* high-expressing cancer cell lines of the skin (dark grey bars). The mutational status of TP53 is indicated (green: wildtype (WT) and red: mutation, single nucleotide polymorphism (SNP)). The responsiveness of malignant cells towards application of truncated *ITIH5* polypeptides (*ITIH5*<sup>161aa</sup> and *ITIH5*<sup>681aa</sup>) is indicated (green: responder cell line; red: non-responder cell line).
