# Supplementary material for: ITIH5-Derived Polypeptides Covering the VIT Domain Suppress the Growth of Human Cancer Cells In Vitro
Source: Cancers (Basel). 2022 Jan 19;14(3):488. doi: 10.3390/cancers14030488 (PMC8833355; doi:10.3390/cancers14030488)
Supplement: Supplementary file 1 [file cancers-14-00488-s001.zip]

Archive with 5 entries (5 files):
- rek. ITIH5.JPG
- Scan_2021-08-23 15-11-28.pdf
- Scan_2021-08-30 09-27-37.pdf
- Supplementary Figure S1.pdf
- Supplementary Figure S2.pdf
