# Supplementary figures and images for: ITIH5-Derived Polypeptides Covering the VIT Domain Suppress the Growth of Human Cancer Cells In Vitro
Source: MDPI journal article supplement (doi:10.3390/cancers14030488), 2022-01-19

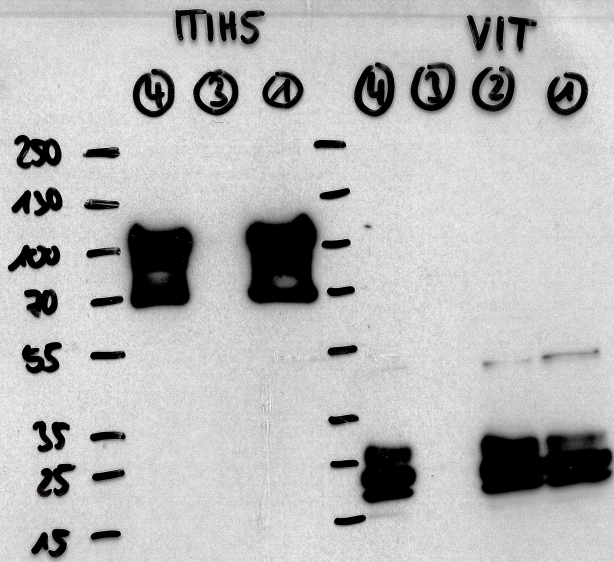

Supplement: s1 [file s1]

5min

Control

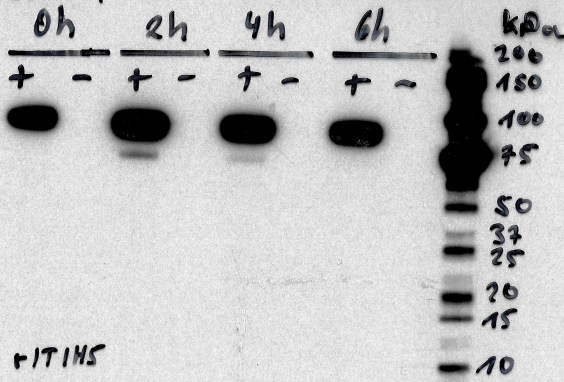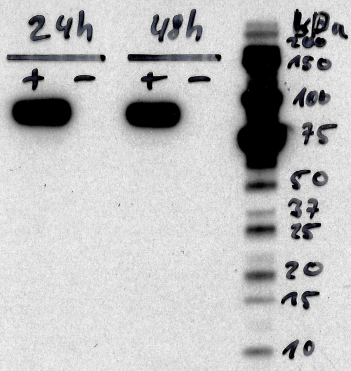

+ = FITINS  
- = olive Engate

Supplement: s1 [file s1]
